# Supplementary material for: Proteomic and functional comparison between human induced and embryonic stem cells
Source: eLife journal article supplement (doi:10.7554/elife.92025), 2024-02-23
Supplement: fig1-data2 [file elife-92025-fig1-data2-v1.zip]

NANOG →

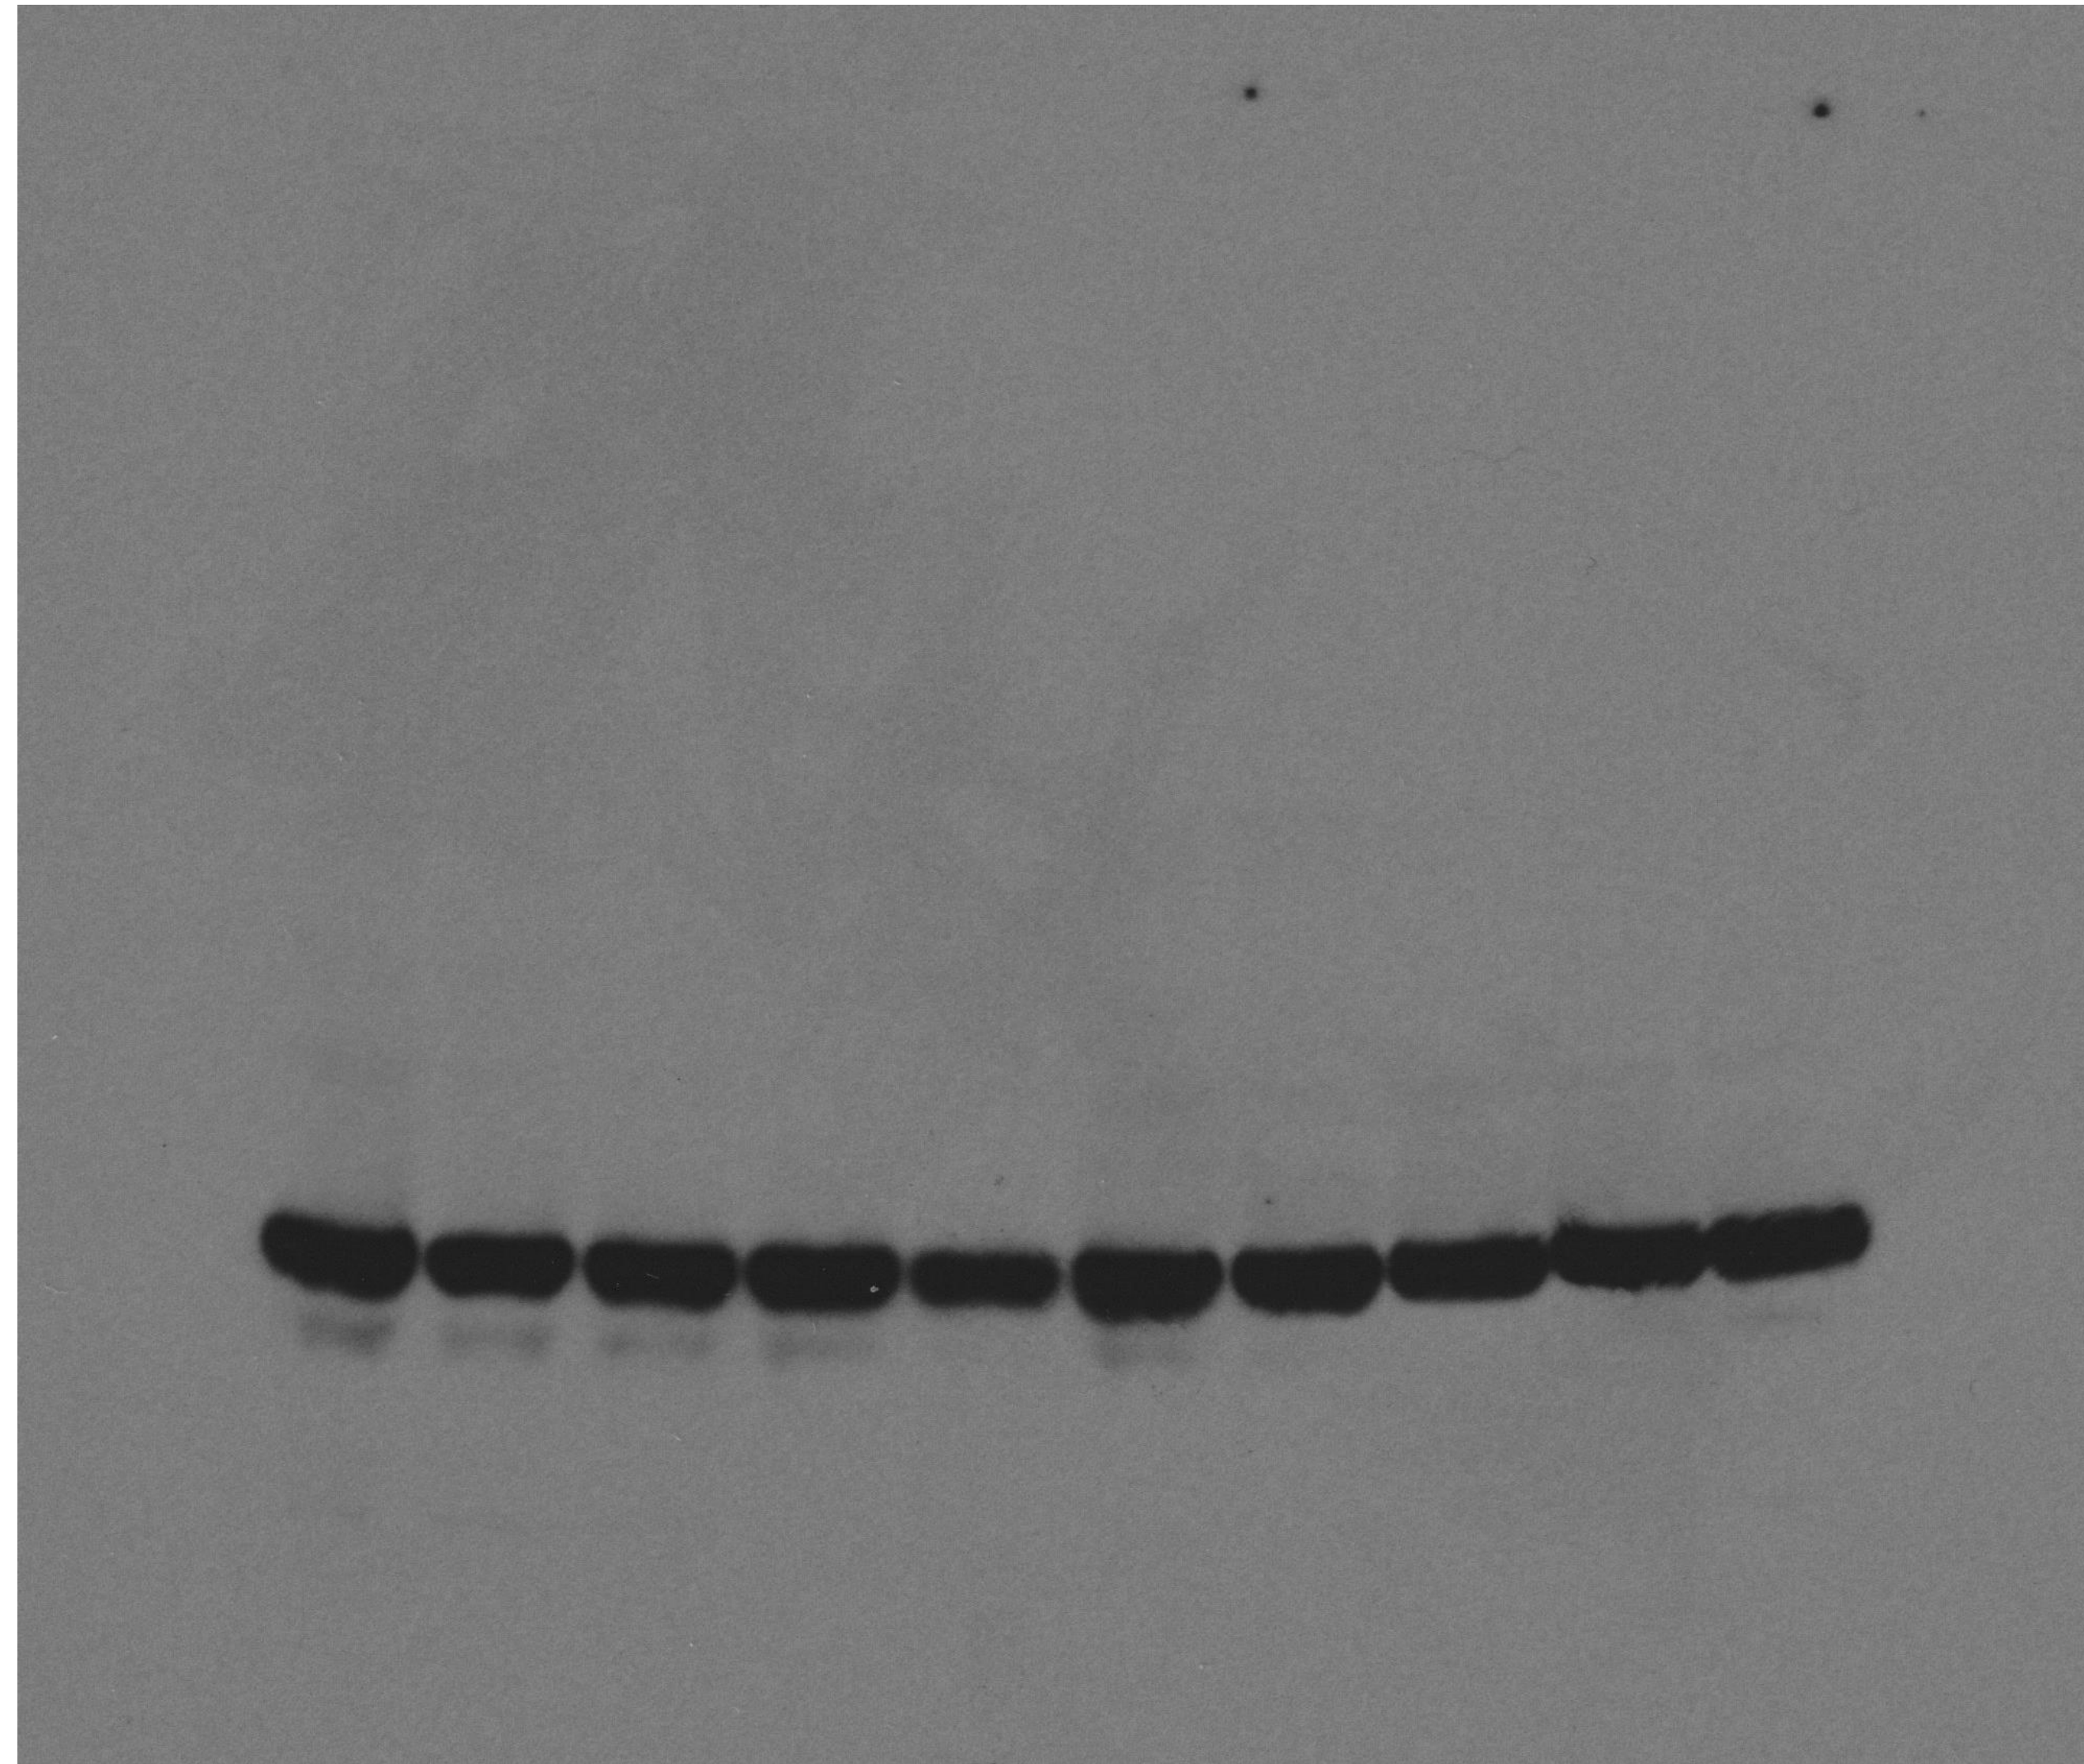

*H1*

*H9*

*SA121*

*SA181*

*aizi1*

*bubh3*

*kucg2*

*oaqd3*

*ueah1*

*wibj2*



OCT4 →

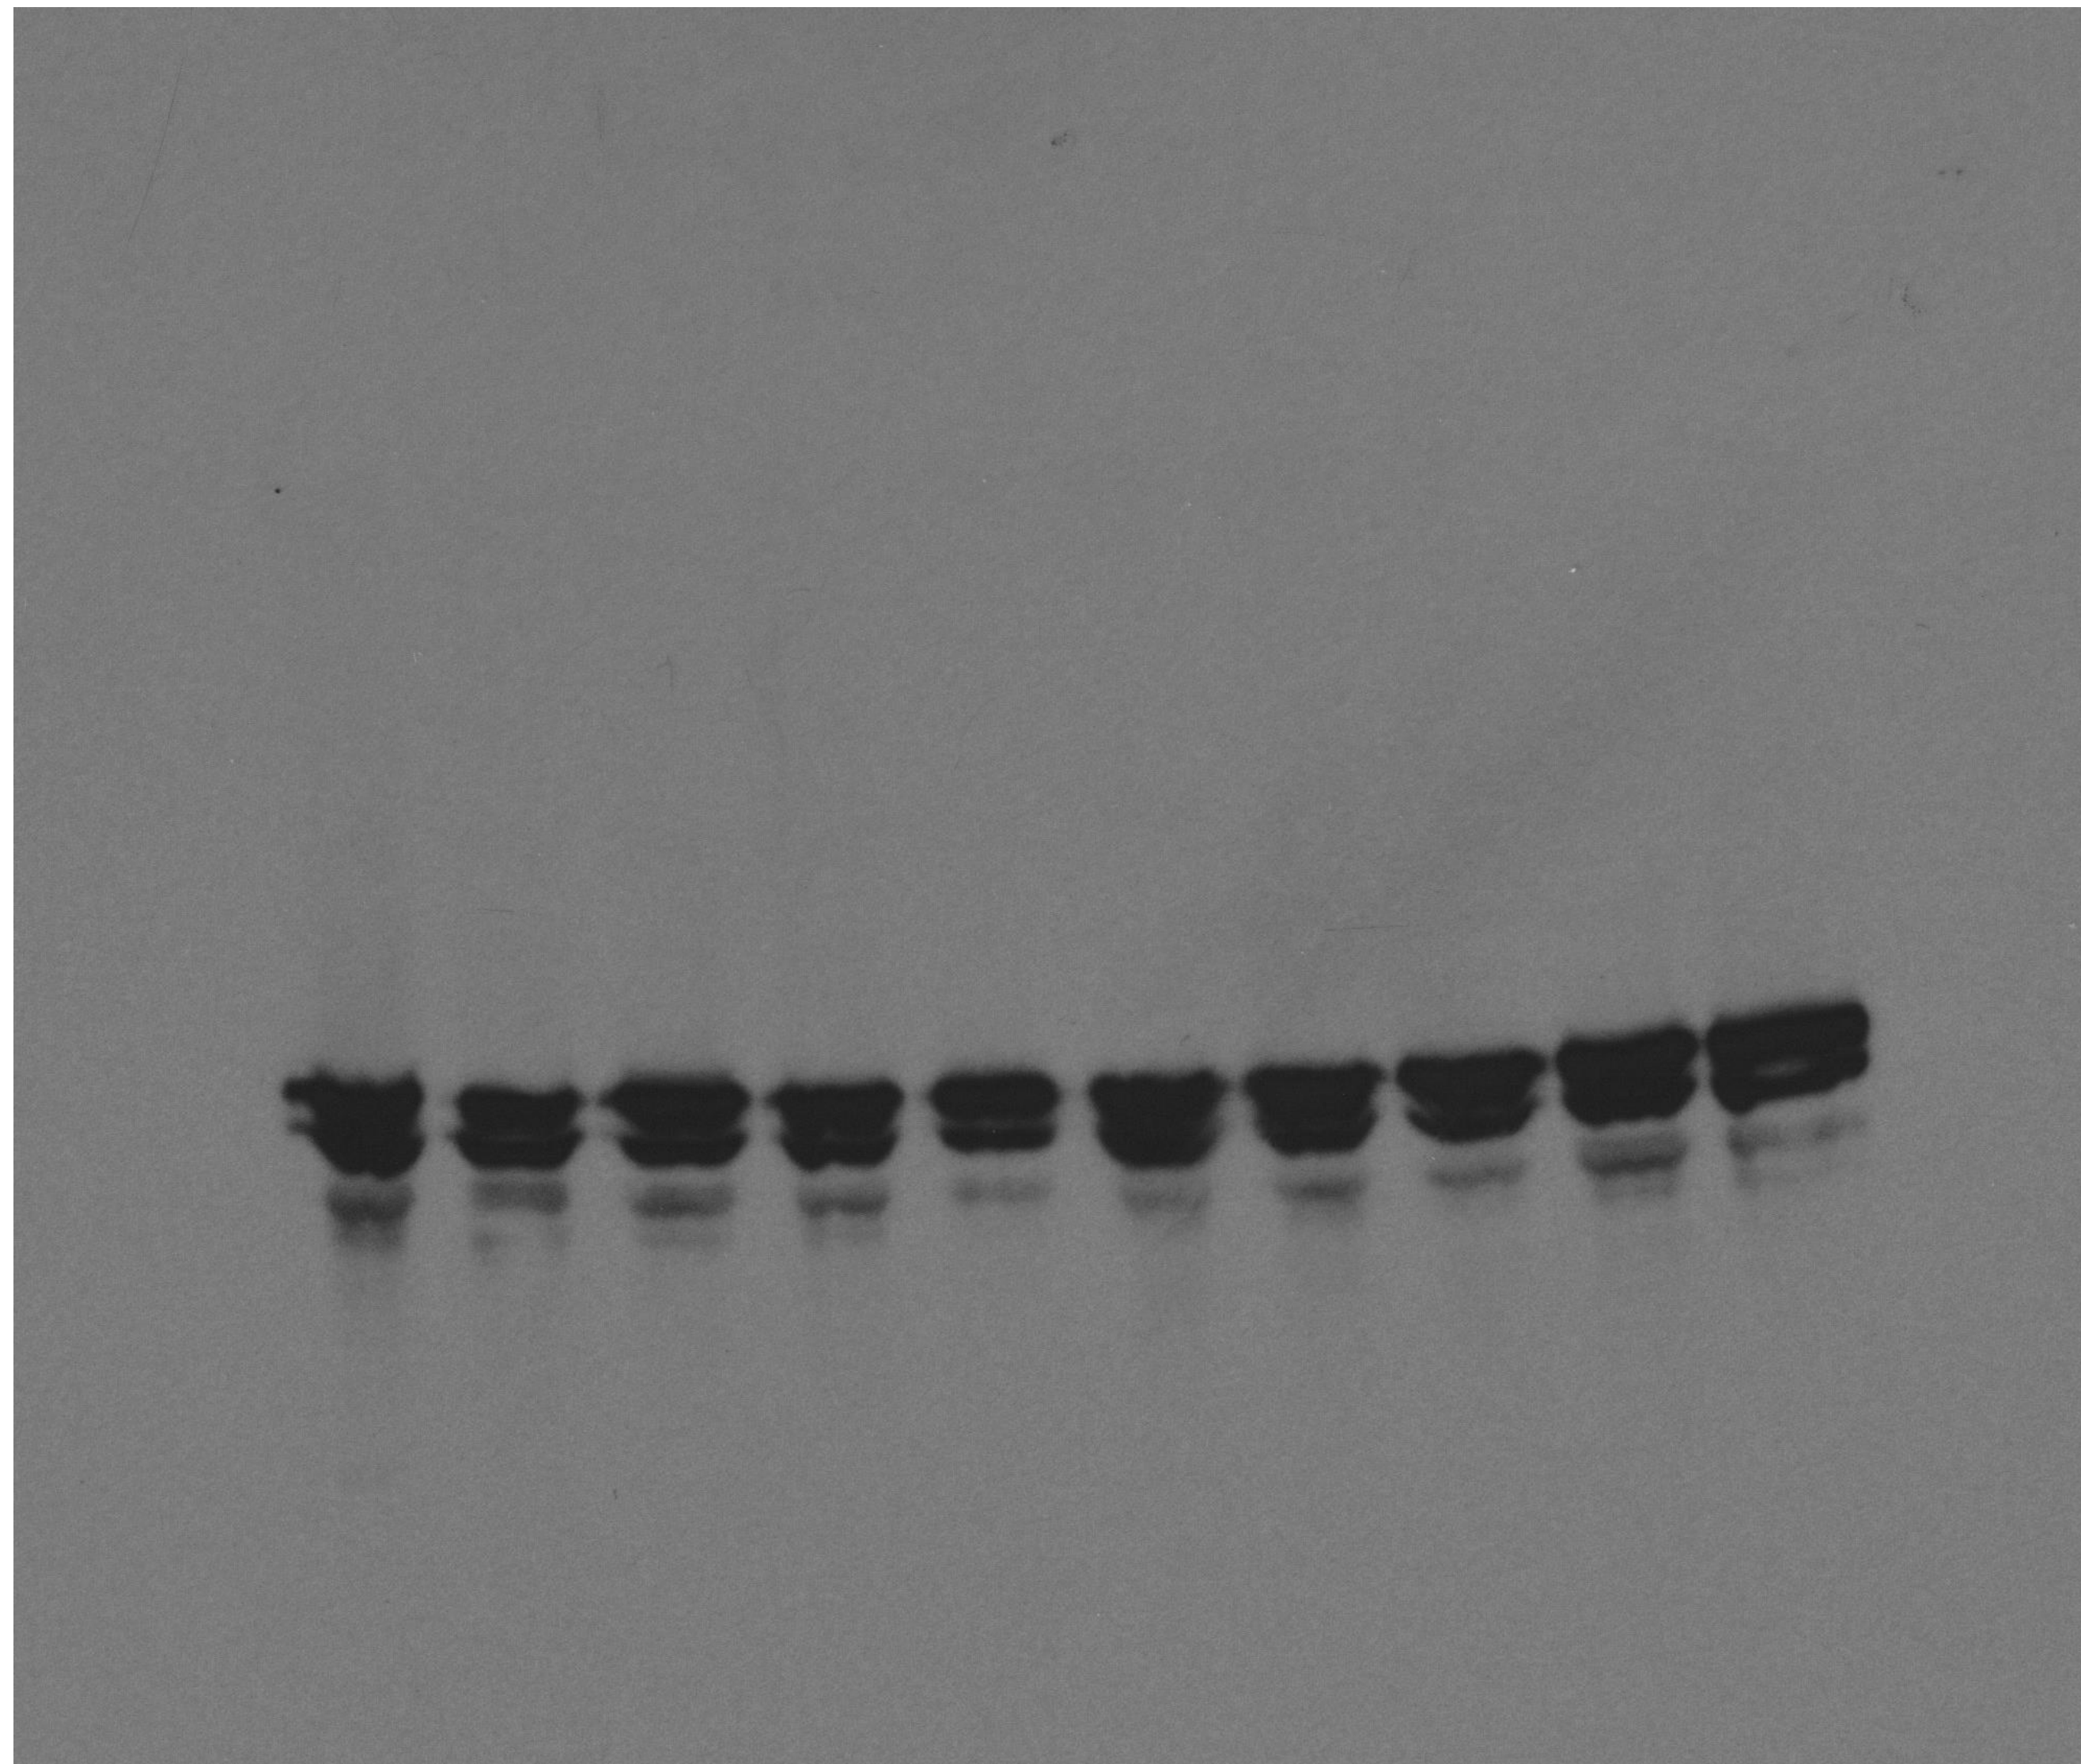

*H1*

*H9*

*SA121*

*SA181*

*aizi1*

*bubh3*

*kucg2*

*oaqd3*

*ueah1*

*wibj2*



SOX2 →

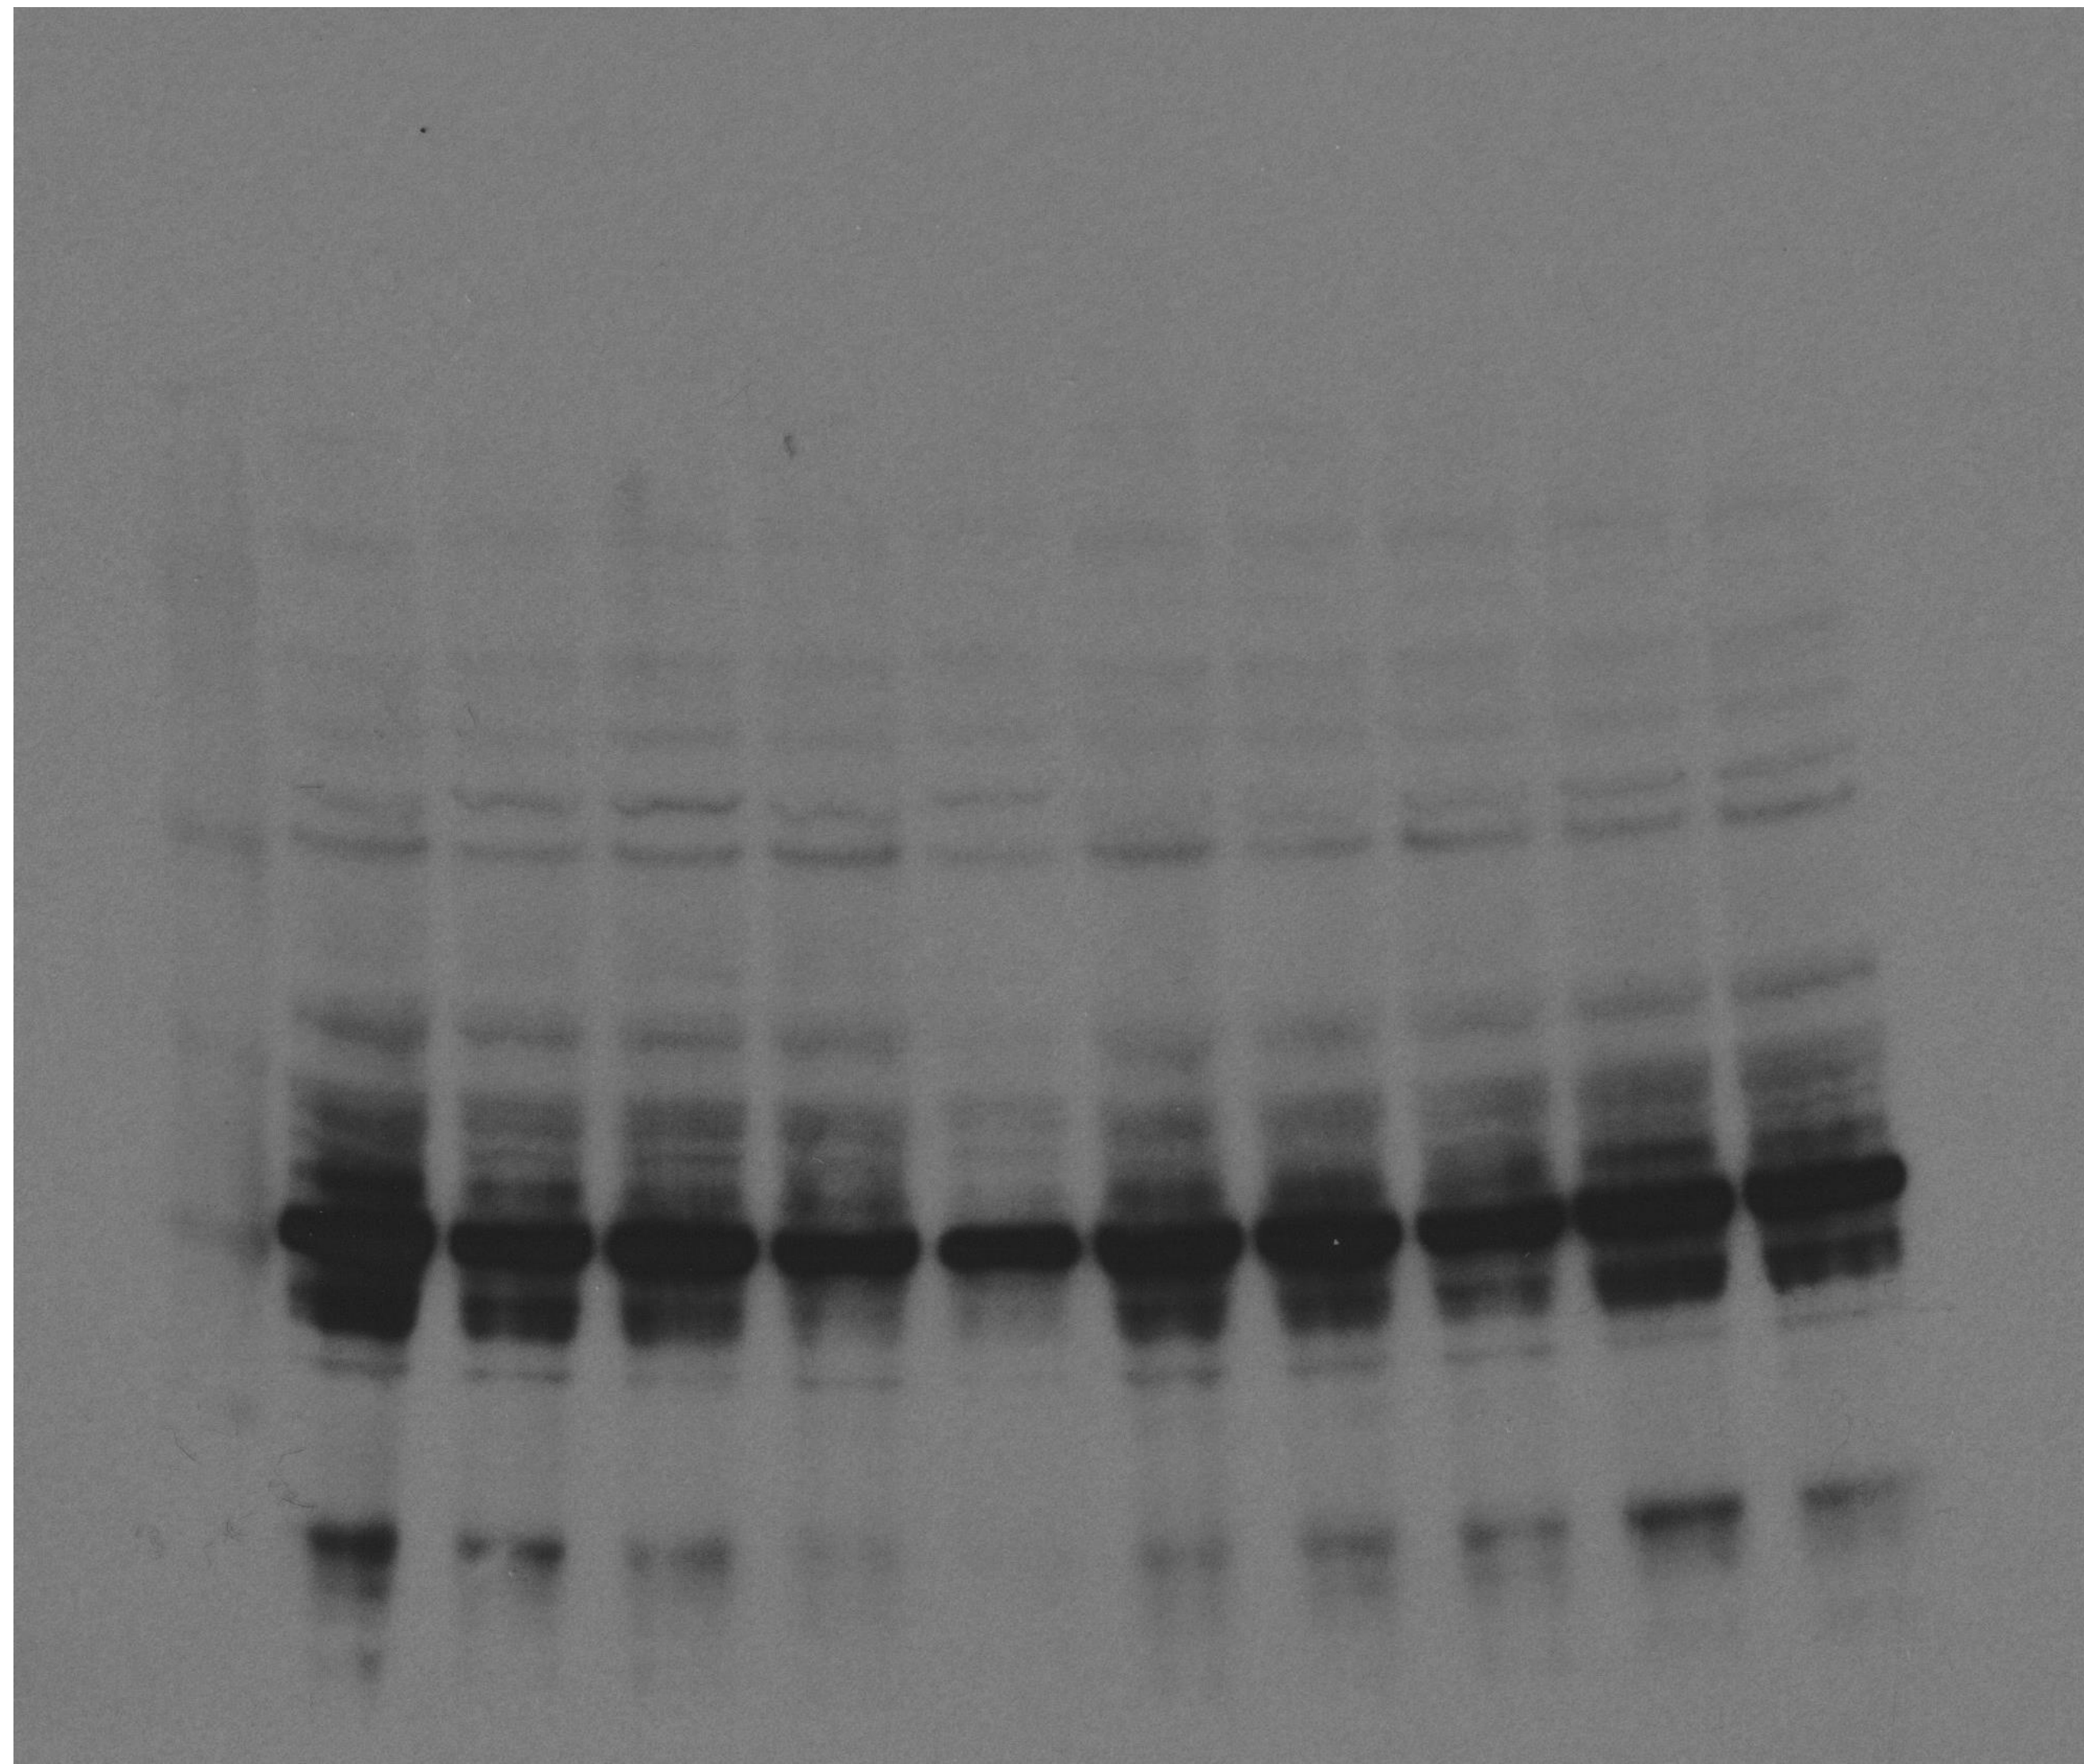

*H1*

*H9*

*SA121*

*SA181*

*aizi1*

*bubh3*

*kucg2*

*oaqd3*

*ueah1*

*wibj2*



GAPDH →

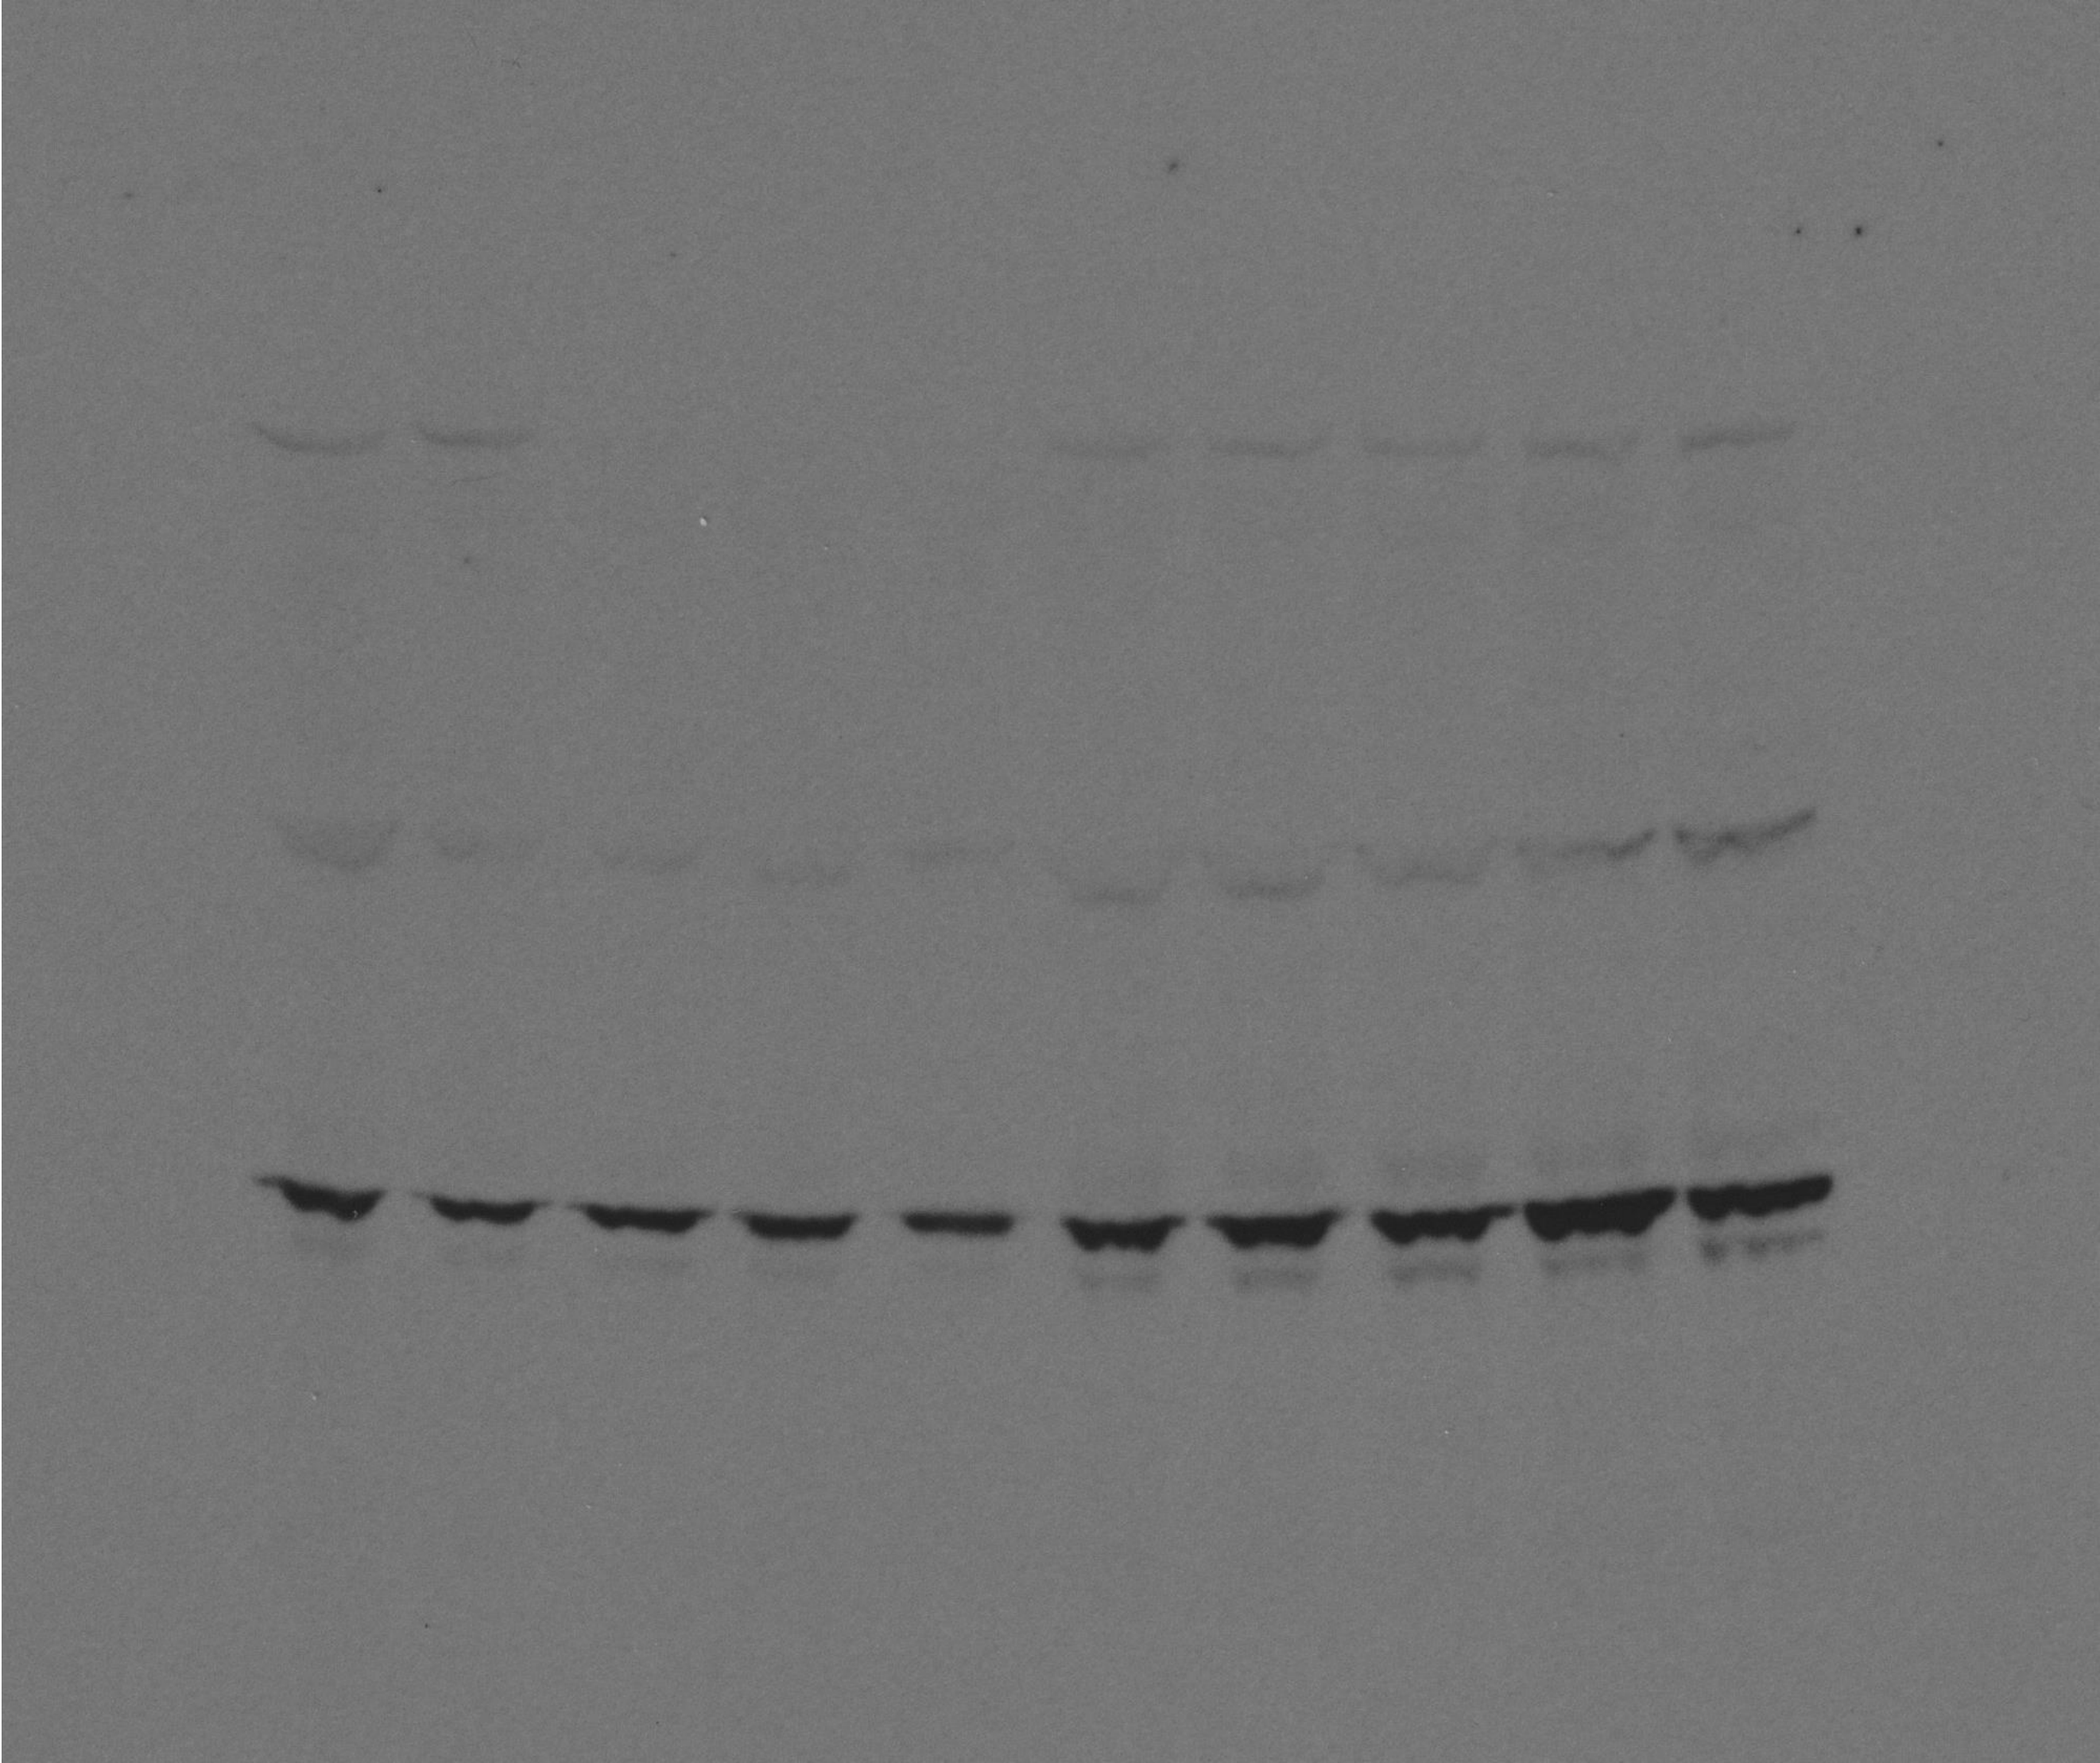

*H1*

*H9*

*SA121*

*SA181*

*aizi1*

*bubh3*

*kucg2*

*oaqd3*

*ueah1*

*wibj2*

**ANTI-NANOG**

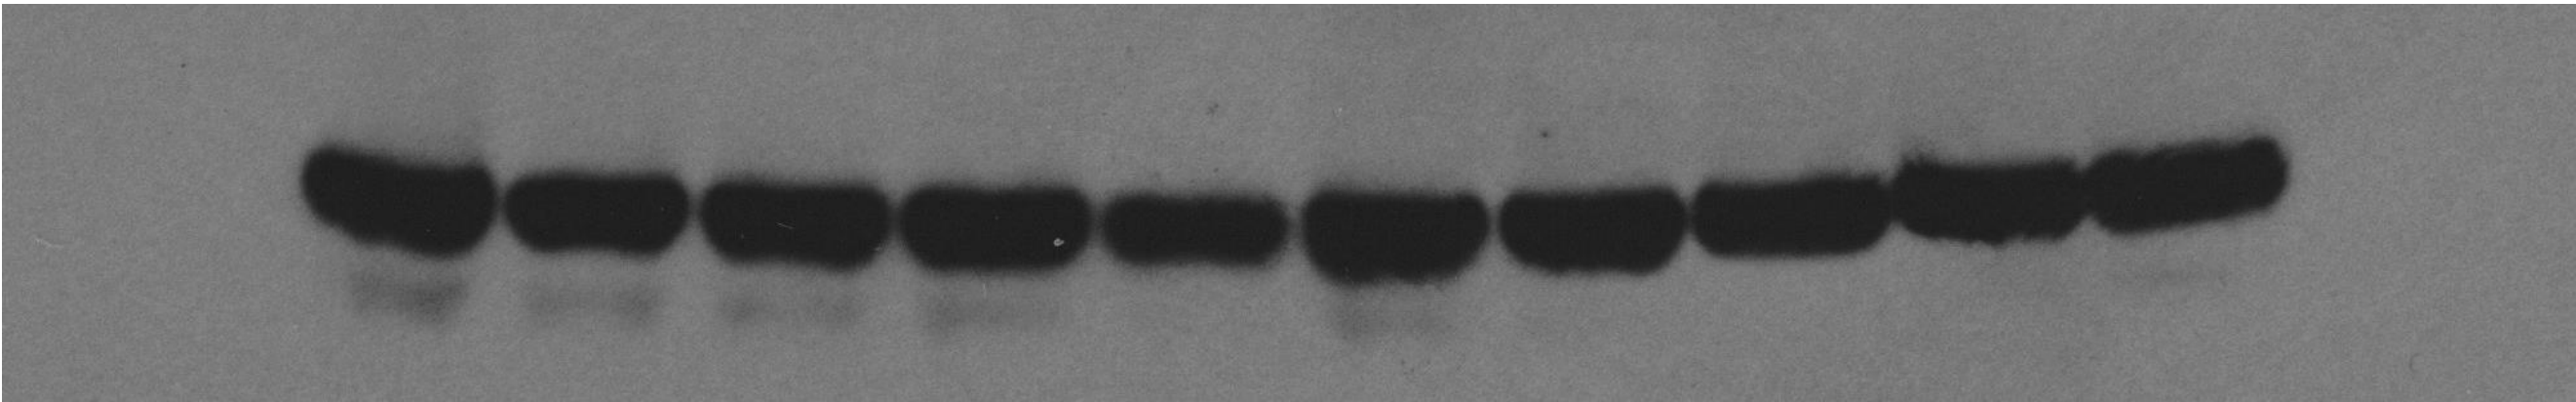

**ANTI-OCT4**

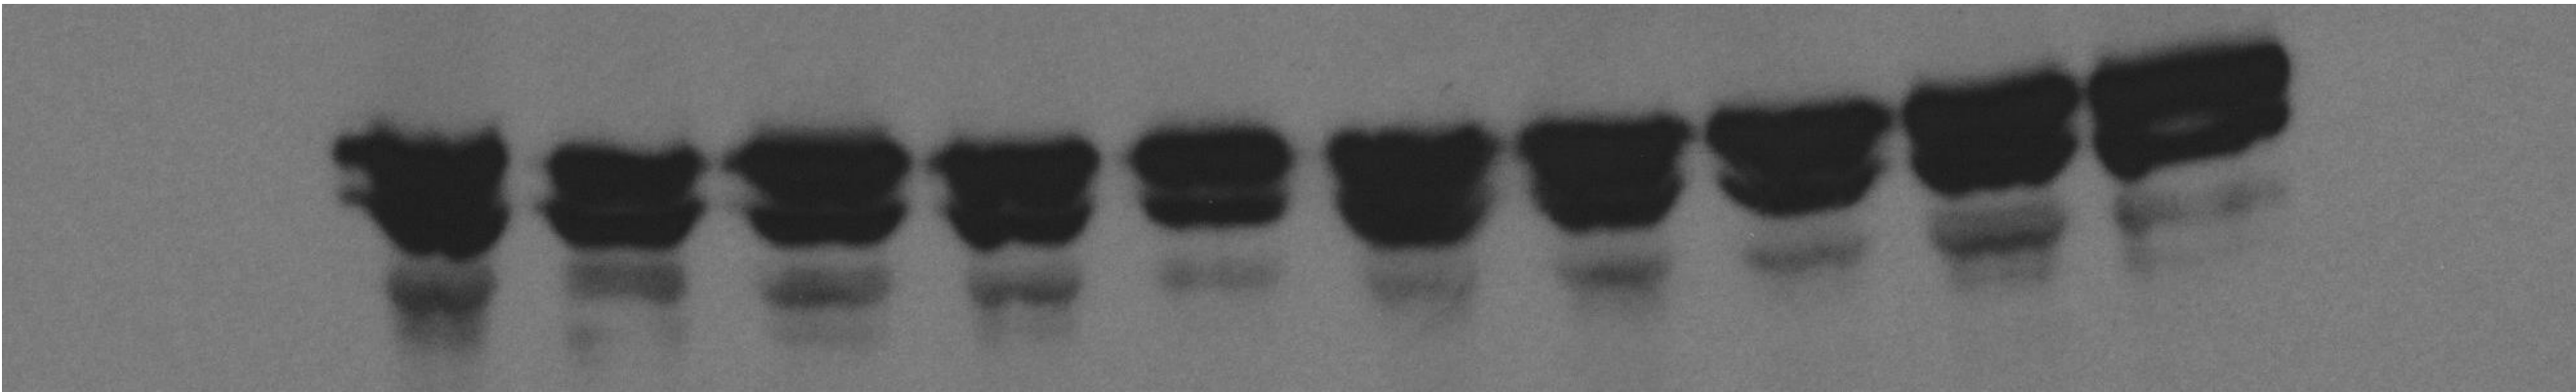

**ANTI-SOX2**

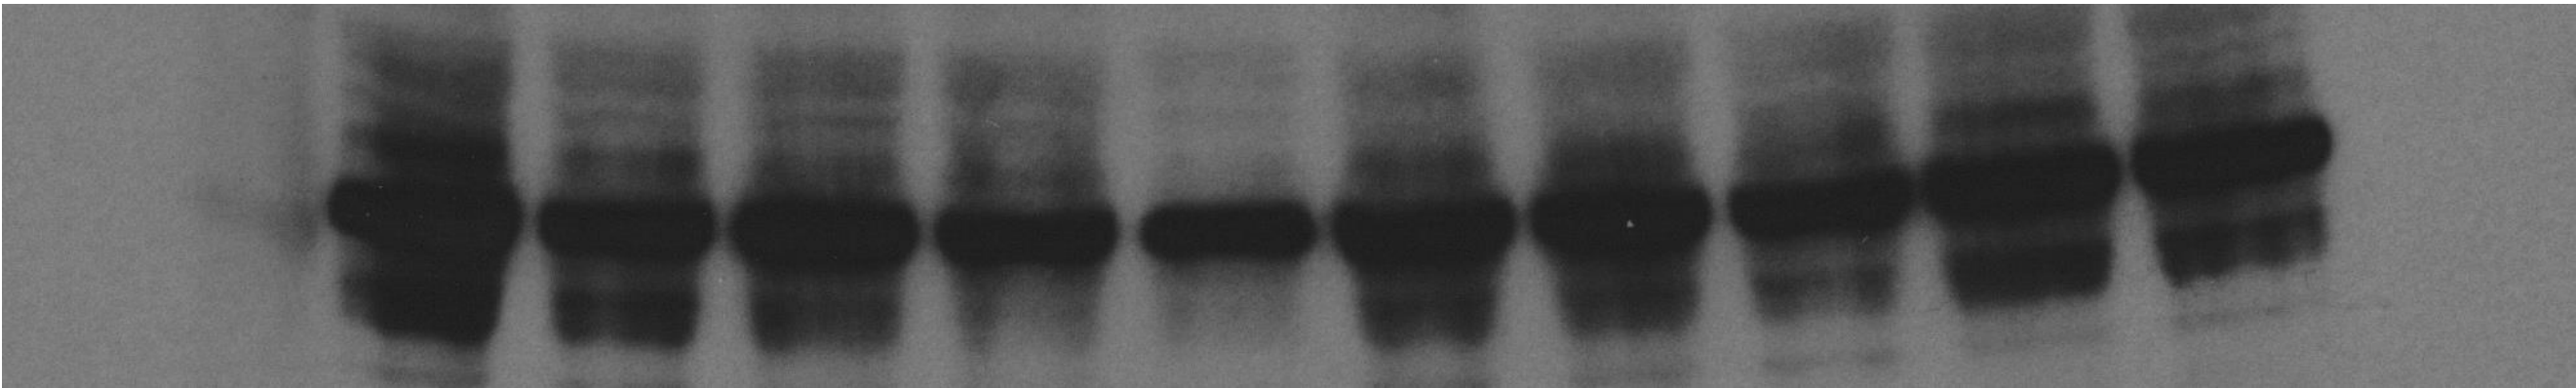

**ANTI-GAPDH**

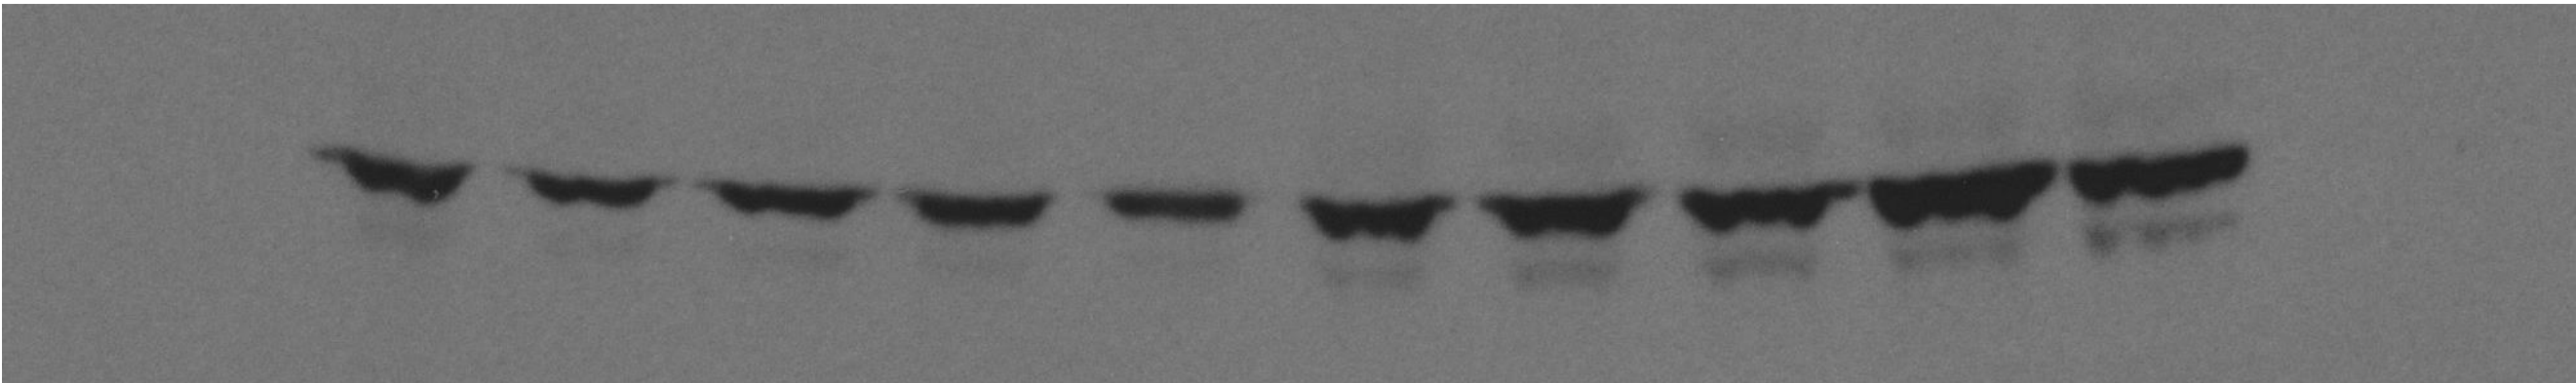

*H1*   *H9*   *SA121*   *SA181*   *aizi1*   *bubh3*   *kucg2*   *oaqd3*   *ueah1*   *Wibj2*
