# Supplementary figures and images for: Proteomic and functional comparison between human induced and embryonic stem cells
Source: eLife journal article supplement (doi:10.7554/elife.92025), 2024-02-23

**Figure 6i**

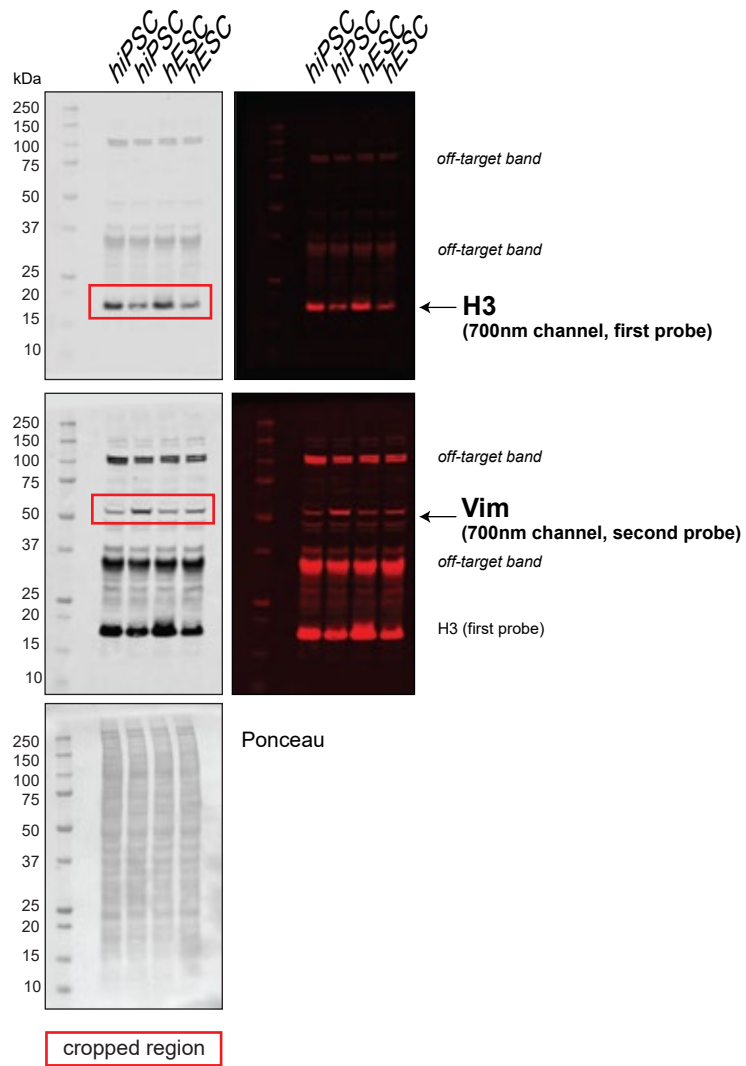

**Figure 6j**

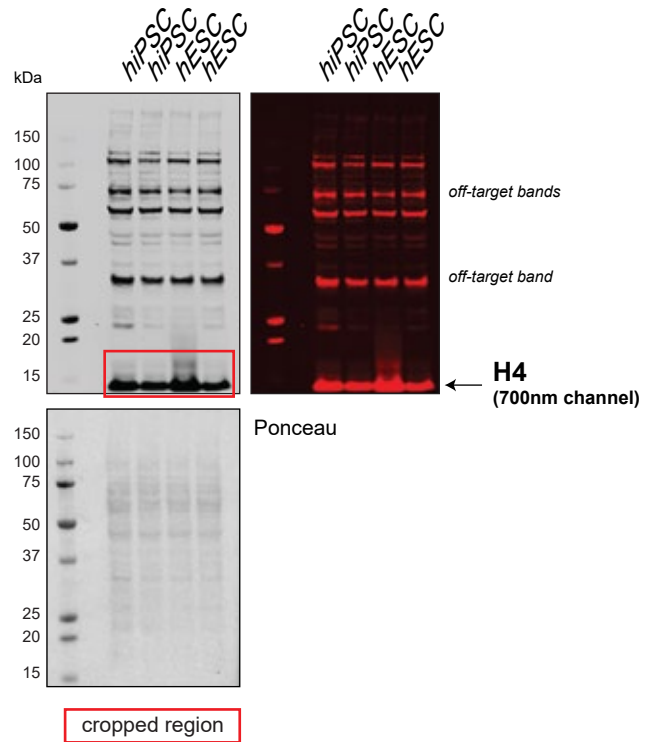

Supplement: fig6-data2 [file elife-92025-fig6-data2-v1.zip]
